# Supplementary material for: SPA14 liposomes combining saponin with fully synthetic TLR4 agonist provide adjuvanticity to hCMV vaccine candidate
Source: PubMed Central journal article supplement — NPJ Vaccines. 2024 Dec 19;9:253. doi: 10.1038/s41541-024-01046-0 (PMC11659416; doi:10.1038/s41541-024-01046-0), 2024-12-19
Supplement: 41541_2024_1046_MOESM1_ESM.pdf [file 41541_2024_1046_MOESM1_ESM.pdf]

## SUPPLEMENTARY INFORMATION

Supplementary Table and Figures for:

SPA14 liposomes combining saponin with fully synthetic TLR4 agonist provide adjuvanticity to hCMV vaccine candidate.

**Supplementary Table 1. Response to SPA14 and AS01B adjuvants in the MIMIC® PTE module.**

| Assay parameter                      | Dose  | SPA14-20 | SPA14-8 | AS01B | Mock | L+R     | E6020   | MPLA   | Liposome |
|--------------------------------------|-------|----------|---------|-------|------|---------|---------|--------|----------|
| % Live cells                         | 1:20  | 62.3     | 60.1    | 58.0  | 70.6 | 28.4    | x       | 75.0   | x        |
|                                      | 1:40  | 67.0     | 61.0    | 61.4  | x    | x       | 39.3    | x      | 57.2     |
|                                      | 1:80  | 69.1     | 64.6    | 68.1  | x    | x       | x       | x      | x        |
|                                      | 1:160 | 63.4     | 62.4    | 65.5  | x    | x       | x       | x      | x        |
| % CD86+ cells (parent HLA-DR+CD11c+) | 1:20  | 16.8     | 15.3    | 11.3  | 5.1  | 20.1    | x       | 18.3   | x        |
|                                      | 1:40  | 17.4     | 15.3    | 9.9   | x    | x       | 26.5    | x      | 9.3      |
|                                      | 1:80  | 15.3     | 15.4    | 9.8   | x    | x       | x       | x      | x        |
|                                      | 1:160 | 13.7     | 14.2    | 7.7   | x    | x       | x       | x      | x        |
| IL-6 (pg/ml)                         | 1:20  | 2870.0   | 140.6   | 53.2  | 18.6 | 16651.4 | x       | 3165.7 | x        |
|                                      | 1:40  | 1115.9   | 52.5    | 33.9  | x    | x       | 34390.6 | x      | 15.8     |
|                                      | 1:80  | 252.9    | 26.5    | 24.0  | x    | x       | x       | x      | x        |
|                                      | 1:160 | 54.3     | 22.8    | 21.2  | x    | x       | x       | x      | x        |
| PGE2 (pg/ml)                         | 1:20  | 883.80   | 53.36   | 47.0  | 24.6 | 3345.3  | x       | 404.9  | x        |
|                                      | 1:40  | 271.35   | 55.54   | 45.5  | x    | x       | 4144.2  | x      | 14.2     |
|                                      | 1:80  | 118.12   | 45.25   | 33.0  | x    | x       | x       | x      | x        |
|                                      | 1:160 | 57.20    | 46.30   | 34.5  | x    | x       | x       | x      | x        |

The MIMIC® PTE was treated with indicated human dose dilutions of adjuvants for 48 hrs. The cells were then harvested and evaluated for cell viability and expression of CD86 on CD11c+ HLA DR+ cells. IL-6 secretion was determined as a representative cytokine in the culture supernatants by Luminex based multiplex assay. PGE-2 secretion was determined by ELISA in the culture supernatants. E6020 (200 ng/mL), MPL (5000 ng/mL) and QS21-Liposomes (SPA14 without E6020 at a 1:40 dilution) were used in the assay as benchmarks along with an LPS+R848 positive control. Mean group values are shown; N= 8-15 donors/group.

## Supplementary Figure 1

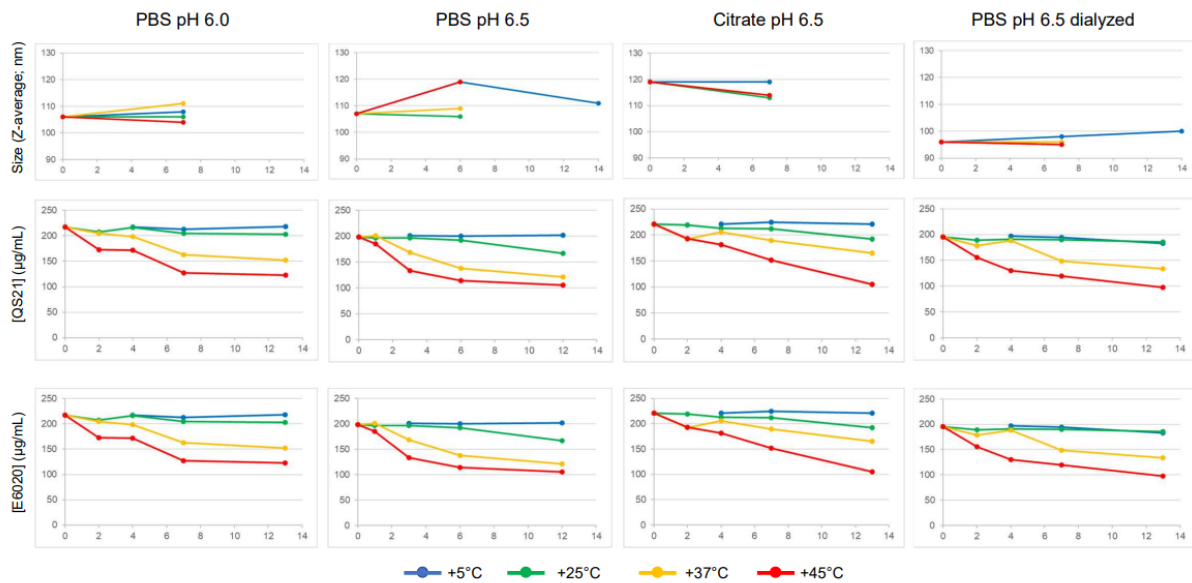

### Supplementary Fig. 1. Accelerated heat stability study of SPA14 (preformulation study).

DOPC/Chol/E6020 liposomes (8:2:0.016 mg/mL) were manufactured in water as described in the Material and Methods section and diluted 1:1 volume/volume with a solution of QS21 at 0.4 mg/mL in PBS pH 6.0, PBS pH 6.5 or in 50 mM Citrate buffer pH 6.3 to generate SPA14-8 in different buffers containing 2.5% residual ethanol from the formulation process. Aliquots of the different preparations were placed under nitrogen in capped borosilicate glass vials and stored at 5°C, 25°C, 37°C or 45°C in temperature-controlled incubators. The stability of the different preparations in terms of pH and osmolality (not shown because of no variation), particle size (Z-average by DLS) and QS21 and E6020 chemical integrity by HPLC was followed over 14 weeks and compared to the stability of SPA14-8 dialyzed against PBS pH 6.5 as to remove the traces of residual ethanol from the manufacturing process.

## Supplementary Figure 2

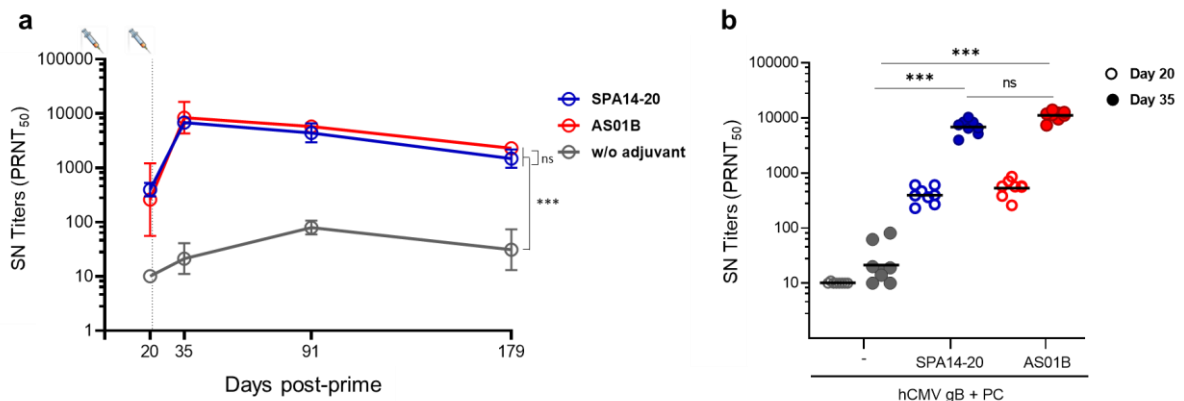

### Supplementary Fig. 2. Serum neutralizing antibody response to hCMV virus over time in the immunized mice as determined on MRC-5 fibroblasts.

**a**, BADrUL131-Y4 CMV virus strain neutralizing titers (PRNT<sub>50</sub>) were determined using MRC-5 fibroblasts and represented over time. For each group, geometric mean of neutralizing titers (GMT) and 95% confidence intervals are represented. **b**, Individual neutralizing titers from each mouse at D20 (3 weeks after a single immunization; open circles) and D35 (2 weeks after the second immunization; close circles) are shown as scattered plots with group GMTs as horizontal bars. Groups of mice immunized in the absence of adjuvant (○, ●), in the presence of SPA14-20 (○, ●) or AS01B (○, ●) are shown. Group comparisons were done by Tukey or Dunnett adjustment. We applied one- or two-way or repeated ANOVA for group comparisons (\*  $p$ -value<0.05, \*\*  $p$ -value<0.01, \*\*\*  $p$ -value<0.001).

## Supplementary Figure 3

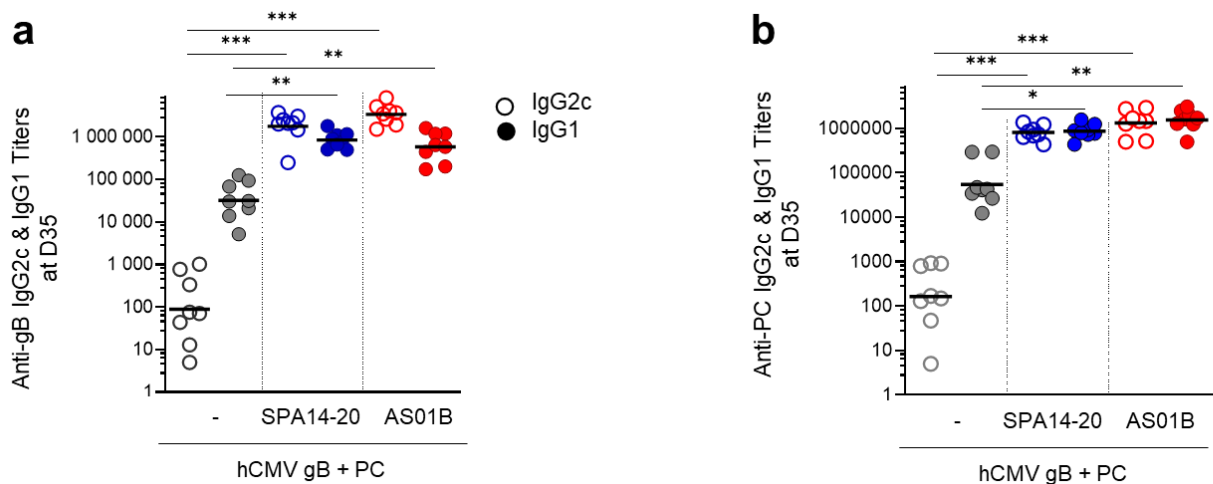

### Supplementary Fig. 3. Individual D35 serum antibody titers to hCMV antigens in the immunized mice.

**a**, IgG1 (filled circles) and IgG2c (open circles) titers specific to CMV-gB and **b**, to PC as determined two weeks following the second immunization (D35) were reported on a (Log<sub>10</sub>) scale. For each group, individual titers are shown as scattered plots with group GMTs as horizontal bars. Groups of mice immunized in the absence of adjuvant (○, ●), in the presence of SPA14-20 (○, ●) or AS01B (○, ●) are shown. Group comparisons were done by Tukey adjustment and one-way ANOVA (\*  $p$ -value<0.05, \*\*  $p$ -value<0.01, \*\*\*  $p$ -value<0.001).

## Supplementary Figure 4

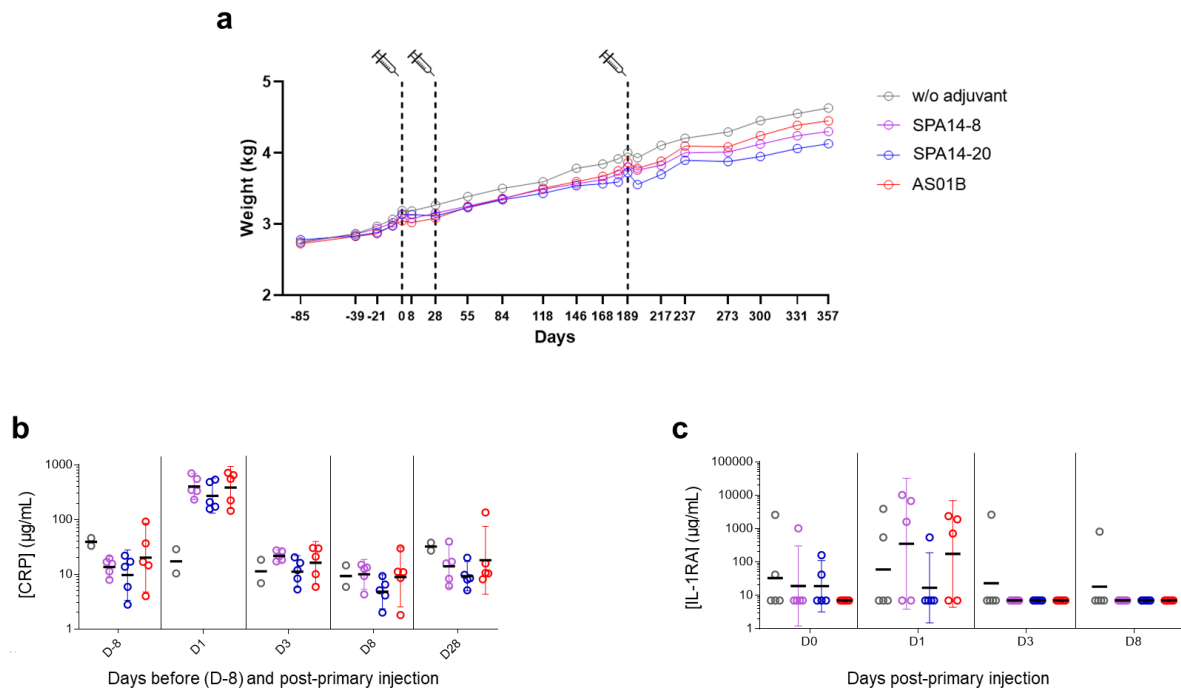

### Supplementary Fig. 4. Monitoring of clinical parameters in the immunized macaques.

**a**, Mean body weights **b**, serum CRP concentrations and **c**, serum IL-1Ra concentrations were monitored over time following immunization with CMV-gB + PC in the absence of adjuvant (○), in the presence of SPA14-20 (○), SPA14-8 (○) or AS01B (○). Individual CRP and IL-1Ra levels are shown for each group as scattered plots and group geometric means as horizontal bars.
